# Supplementary material for: Development of a new cucumber reference material for pesticide residue analysis: feasibility study for material processing, homogeneity and stability assessment
Source: PubMed Central journal article supplement (PMC4383829; doi:10.1007/s00216-015-8476-x), 2015-01-28
Supplement: 216_2015_8476_MOESM1_ESM.pdf [file 216_2015_8476_MOESM1_ESM.pdf]

## **Analytical and Bioanalytical Chemistry**

### **Electronic Supplementary Material**

#### **Development of a new cucumber reference material for pesticide residue analysis: Feasibility study for material processing, homogeneity and stability assessment**

Susana Grimalt, Stefan Harbeck, Penka Shegunova, John Seghers, Berit Sejerøe-Olsen, Håkan Emteborg, Marta Dabrio

## Annex I: UPLC-MS/MS: MS/MS transitions

**Table S1** Tandem mass spectrometry parameters optimized at triple quadrupole instrument Xevo-TQS for native pesticides. The transitions are defined as Q for quantification and q<sub>1</sub> and q<sub>2</sub> for confirmation purpose

| Analyte      | Rt (min) | MS/MS transitions               | Cone (V) | Collision (eV) |
|--------------|----------|---------------------------------|----------|----------------|
| Acetamiprid  | 4.36     | 223 > 90 (q <sub>2</sub> )      | 10       | 30             |
|              |          | 223 > 126 (Q)                   | 10       | 25             |
|              |          | 223 > 128 (q <sub>1</sub> )     | 10       | 20             |
| Azoxystrobin | 6.01     | 404 > 172 (q <sub>2</sub> )     | 15       | 55             |
|              |          | 404 > 329 (Q)                   | 15       | 30             |
|              |          | 404 > 344 (q <sub>1</sub> )     | 15       | 25             |
| Carbendazim  | 4.57     | 192 > 105 (q <sub>2</sub> )     | 30       | 35             |
|              |          | 192 > 132 (q <sub>1</sub> )     | 30       | 30             |
|              |          | 192 > 160 (Q)                   | 30       | 15             |
| Chlorpyrifos | 7.23     | 349.9 > 124.9 (q <sub>2</sub> ) | 40       | 20             |
|              |          | 349.9 > 197.9 (Q)               | 40       | 20             |
|              |          | 351.9 > 199.9 (q <sub>1</sub> ) | 40       | 20             |
| Diazinon     | 6.69     | 305 > 97 (q <sub>2</sub> )      | 5        | 35             |
|              |          | 305 > 153 (q <sub>1</sub> )     | 5        | 20             |
|              |          | 305 > 169 (Q)                   | 5        | 20             |
| Imazalil     | 6.66     | 297 > 69 (q <sub>1</sub> )      | 10       | 20             |
|              |          | 297 > 159 (Q)                   | 10       | 25             |
|              |          | 299 > 161 (q <sub>2</sub> )     | 10       | 30             |
| Imidacloprid | 4.16     | 256 > 84 (q <sub>2</sub> )      | 25       | 15             |
|              |          | 256 > 175 (q <sub>1</sub> )     | 25       | 20             |
|              |          | 256 > 209 (Q)                   | 25       | 15             |
| Malathion    | 6.25     | 331 > 79 (q <sub>2</sub> )      | 5        | 40             |
|              |          | 331 > 127 (Q)                   | 5        | 10             |
|              |          | 331 > 285 (q <sub>1</sub> )     | 5        | 5              |
| Malaoxon     | 5.32     | 315 > 99 (Q)                    | 5        | 20             |
|              |          | 315 > 127 (q <sub>1</sub> )     | 5        | 15             |
|              |          | 315 > 143 (q <sub>2</sub> )     | 5        | 10             |
| Methomyl     | 3.57     | 163 > 88 (Q)                    | 5        | 10             |
|              |          | 163 > 106 (q <sub>1</sub> )     | 5        | 10             |

|               |      |                             |    |    |
|---------------|------|-----------------------------|----|----|
|               |      | 163 > 122 (q <sub>2</sub> ) | 5  | 5  |
| Tebuconazole  | 6.65 | 308 > 70 (Q)                | 5  | 30 |
|               |      | 308 > 125 (q <sub>2</sub> ) | 5  | 35 |
|               |      | 310 > 70 (q <sub>1</sub> )  | 5  | 20 |
| Thiabendazole | 4.94 | 202 > 65 (q <sub>2</sub> )  | 10 | 40 |
|               |      | 202 > 131 (q <sub>1</sub> ) | 10 | 30 |
|               |      | 202 > 175 (Q)               | 10 | 25 |
| Thiodicarb    | 5.54 | 355 > 88 (Q)                | 10 | 15 |
|               |      | 355 > 108 (q <sub>1</sub> ) | 10 | 15 |
|               |      | 355 > 163 (q <sub>2</sub> ) | 10 | 5  |

**Table S2** Tandem mass spectrometry parameters optimized at triple quadrupole instrument Xevo-TQS for isotopic labelled pesticides

| Analyte                             | Rt (min) | MS/MS transitions | Cone (V) | Collision (eV) |
|-------------------------------------|----------|-------------------|----------|----------------|
| Acetamiprid <i>d</i> <sub>3</sub>   | 4.36     | 226 > 126         | 10       | 20             |
| Azoxystrobin <i>d</i> <sub>4</sub>  | 6.01     | 408 > 333         | 15       | 35             |
| Carbendazim <i>d</i> <sub>4</sub>   | 4.57     | 196 > 164         | 30       | 20             |
| Chlorpyrifos <i>d</i> <sub>10</sub> | 7.23     | 360 > 131         | 40       | 20             |
| Diazinon <i>d</i> <sub>10</sub>     | 6.69     | 315 > 170         | 5        | 20             |
| Fenitrothion <i>d</i> <sub>6</sub>  | 6.27     | 284 > 131         | 15       | 25             |
| Imazalil <i>d</i> <sub>5</sub>      | 6.66     | 302 > 159         | 15       | 20             |
| Imidacloprid <i>d</i> <sub>4</sub>  | 4.16     | 260 > 213         | 25       | 15             |
| Malathion <i>d</i> <sub>10</sub>    | 6.25     | 341 > 132         | 5        | 10             |
| Malaoxon <i>d</i> <sub>6</sub>      | 5.32     | 322 > 100         | 25       | 25             |
| Methomyl <i>d</i> <sub>3</sub>      | 3.57     | 166 > 88          | 5        | 10             |
| Tebuconazole <i>d</i> <sub>6</sub>  | 6.65     | 314 > 72          | 5        | 20             |
| Thiabendazole <i>d</i> <sub>6</sub> | 4.94     | 208 > 136         | 10       | 30             |
| Thiodicarb <i>d</i> <sub>6</sub>    | 5.54     | 361 > 88          | 15       | 15             |

## Annex II: GC-MS/MS: MS/MS transitions

**Table S3** Tandem mass spectrometry parameters optimized at triple quadrupole instrument TSQ Quantum XLS for native pesticides. The transitions are defined as Q for quantification and q<sub>1</sub> and q<sub>2</sub> for confirmation purpose

| Analyte                     | Rt window (min) | Collision Energy (V) | Transition                  |
|-----------------------------|-----------------|----------------------|-----------------------------|
| Azoxystrobin                | 17.3-18.3       | 25                   | 344 > 329 (Q)               |
|                             |                 | 25                   | 388 > 300 (q <sub>1</sub> ) |
|                             |                 | 20                   | 388 > 345 (q <sub>2</sub> ) |
| Cypermethrin                | 15.7-16.5       | 30                   | 181 > 152 (Q)               |
|                             |                 | 30                   | 181 > 153 (q <sub>1</sub> ) |
|                             |                 | 30                   | 163 > 91 (q <sub>2</sub> )  |
| Diazinon                    | 9.5-10.2        | 15                   | 304 > 179 (q <sub>1</sub> ) |
|                             |                 | 15                   | 304 > 180 (Q)               |
|                             |                 | 25                   | 179 > 137 (q <sub>2</sub> ) |
| $\alpha + \beta$ Endosulfan | 12.0-13.4       | 20                   | 339 > 195 (Q)               |
|                             |                 | 20                   | 339 > 197 (q <sub>1</sub> ) |
|                             |                 | 25                   | 241 > 171 (q <sub>2</sub> ) |
|                             |                 | 25                   | 241 > 206 (q <sub>3</sub> ) |
|                             |                 | 10                   | 277 > 260 (Q)               |
| Fenitrothion                | 10.7-11.4       | 20                   | 277 > 109 (q <sub>1</sub> ) |
|                             |                 | 15                   | 260 > 125 (q <sub>2</sub> ) |
|                             |                 | 20                   | 314 > 245 (Q)               |
| Iprodione                   | 13.7-14.4       | 25                   | 316 > 247 (q <sub>1</sub> ) |
|                             |                 | 15                   | 173 > 99 (Q)                |
| Malathion                   | 10.7-11.4       | 15                   | 173 > 117 (q <sub>1</sub> ) |
|                             |                 | 15                   | 127 > 99 (q <sub>2</sub> )  |
|                             |                 | 15                   | 127 > 99 (q <sub>2</sub> )  |

**Table S4** Tandem mass spectrometry parameters optimized at triple quadrupole instrument TSQ Quantum XLS for isotopic labelled pesticides

| Analyte                                                  | Rt window (min) | Collision Energy (V) | Transition |
|----------------------------------------------------------|-----------------|----------------------|------------|
| Azoxystrobin <i>d</i> <sub>4</sub>                       | 17.3-18.3       | 30                   | 348 > 332  |
| Cypermethrin <sup>13</sup> C <sub>6</sub>                | 15.7-16.5       | 30                   | 187 > 158  |
| Diazinon <i>d</i> <sub>10</sub>                          | 9.5-10.2        | 25                   | 183 > 123  |
| $\alpha + \beta$ Endosulfan <sup>13</sup> C <sub>9</sub> | 12.0-13.4       | 15                   | 348 > 132  |
| Fenitrothion <i>d</i> <sub>6</sub>                       | 10.7-11.4       | 20                   | 266 > 131  |
| Iprodione <i>d</i> <sub>7</sub>                          | 13.7-14.4       | 25                   | 320 > 192  |
| Malathion <i>d</i> <sub>10</sub>                         | 10.7-11.4       | 15                   | 183 > 100  |
